# Supplementary material for: The near infrared absorption properties of W18O49
Source: Royal Society of Chemistry journal article supplement (doi:10.1039/c2ra01366e), 2012-01-01
Supplement: c2ra01366e.pdf [file c2ra01366e.pdf]

## The near infrared absorption properties of $W_{18}O_{49}$

Chongshen Guo,\* Shu Yin, Qiang Dong and Tsugio Sato

**Characterization:** The phase compositions of the samples were determined by X-ray diffraction analysis (XRD, Shimadzu XD-D1) using graphite-monochromized  $CuK\alpha$  radiation. The size and shape of the nanoparticles were observed by a transmission electron microscope (TEM, JEOLJEM-2010). HRTEM images and SAED images were obtained on a ZEISS LEO 922 with an accelerating voltage of 200 kV. The optical properties were measured using a spectrophotometer (JASCO V-670), giving an output of transmittance in the UV, visible, and infrared ranges (200-2700nm), where the  $W_{18}O_{49}$  powder was dispersed in a collodion-ethanol mixed solution at a mass ratio of ethanol: collodion:  $W_{18}O_{49}$  = 1.0: 0.93: 0.15, then, the coating solution was painted on a quartz glass by an applicator with a concave shape and a depth of 12.5  $\mu m$ . Thermographic measurements were recorded by a thermographicmeter (FLIR System i7).
